# Human readaptation outpaces loss of antibiotic resistance in livestock-associated MRSA

Marta Matuszewska<sup>1,\*</sup>, Gemma G. R. Murray<sup>1,\*†</sup>, Xiaoliang Ba<sup>1</sup>, Rhiannon Wood<sup>1</sup>, Mark A. Holmes<sup>1</sup> and Lucy A. Weinert<sup>1</sup>

1. Department of Veterinary Medicine, University of Cambridge, Cambridge, CB3 0ES, UK.

\* These authors contributed equally and should be acknowledged as joint first authors.

† Corresponding author. Email: [ggrmurray@gmail.com](mailto:ggrmurray@gmail.com).

**Keywords:** *Staphylococcus aureus*, MRSA, livestock-associated MRSA clonal-complex 398, host-switching, zoonosis, antibiotic resistance, mobile genetic elements, Tn916 transposon, SCCmec,  $\phi$ Sa3 prophage

## Abstract

Mobile genetic elements (MGEs) are agents of horizontal gene transfer in bacteria, but can also be vertically inherited by daughter cells. Establishing the dynamics that led to contemporary patterns of MGEs in bacterial genomes is central to predicting the emergence and evolution of novel and resistant pathogens. Here we develop existing methods to fully characterise the evolutionary history of MGEs in methicillin-resistant *Staphylococcus aureus* (MRSA) clonal-complex (CC) 398. CC398 is the dominant MRSA in European livestock, and a growing cause of human infections. We reconstruct MGE dynamics using a collection of 1,180 CC398 genomes, sampled from livestock and humans, over 27 years. We find that the emergence of livestock-associated CC398 coincided with the acquisition of a Tn916 transposon carrying a tetracycline resistance gene, which has been stably vertically inherited for 57 years. This was followed by the acquisition of a type V SCCmec that carries methicillin, tetracycline and heavy metal resistance genes, which has been maintained by vertical and horizontal transmission for 35 years, with occasional truncations and replacements with type IV SCCmec. In contrast, a class of prophages that carry a human immune evasion gene cluster, that are largely absent from livestock-associated CC398, have been repeatedly gained and lost in both human- and livestock-associated CC398. These contrasting dynamics mean that when livestock-associated MRSA infects humans, adaptation to the human host outpaces loss of antibiotic resistance. In addition, stable inheritance means that antibiotic resistance in livestock-associated MRSA may persist despite ongoing reductions in antibiotic and zinc oxide use in farming.

## Introduction

Mobile genetic elements (MGEs) play an important role in the evolution of bacterial pathogens. They can move rapidly between bacterial genomes, but can also be vertically inherited through stable integration into a host genome. As MGEs often carry genes associated with virulence and antibiotic resistance (Frost et al. 2005; Rankin et al. 2011), an understanding of the drivers and barriers to their acquisition and maintenance is central to predicting the emergence and evolution of novel and resistant pathogens (Brockhurst et al. 2019).

The emergence and evolution of methicillin-resistant *Staphylococcus aureus* (MRSA) across different ecological niches and host species is associated with the horizontal transfer of MGEs. Methicillin resistance is carried by the staphylococcal cassette chromosome element *SCCmec*, and additional MGEs carry resistance to other antibiotics, virulence factors and host-specific adaptations (Hanssen and Ericson Sollid 2006; Jamrozny et al. 2017; Haag et al. 2019; Turner et al. 2019; Matuszewska et al. 2020). While most MRSA clonal complexes (CCs) show an association with specific MGEs, their dynamics are not widely understood, leading to a gap in our understanding of the adaptive potential of *S. aureus* CCs.

Intensification combined with high levels of antibiotic use in farming has led to particular concerns about livestock as reservoirs of antibiotic-resistant human infections (WHO 2015). CC398 has become the dominant MRSA in European livestock. Its rise has been particularly evident in Danish pig farms where the proportion of MRSA-positive herds has increased from <5% in 2008 to 90% in 2018 (DANMAP 2019; Sieber et al. 2019), but it has also been observed in other European countries, and other livestock species (Lekkerkerk et al. 2015; Islam et al. 2017; Anjum et al. 2019). Livestock-associated (LA) MRSA CC398 has been associated with increasing numbers of human infections, in both people with and without direct contact with livestock (Larsen et al. 2017; van Alen et al. 2017; Sieber et al. 2019). Understanding the emergence and success of CC398 in European livestock and its capacity to adapt to the human host is integral to managing the risk that it, and other livestock-associated pathogens, pose to public health.

Previous studies have used genome sequences to reconstruct the evolutionary history of CC398 (Price et al. 2012; Ward et al. 2014; Silva et al. 2017). They identified a largely methicillin-resistant and livestock-associated clade of CC398, that falls as either sister to (Ward et al. 2014) or within (Price et al. 2012; Silva et al. 2017) a largely methicillin-sensitive

and human-associated clade. Through comparing the genomes of isolates from livestock-associated and human-associated CC398, these studies concluded that the emergence of CC398 in livestock was associated with both the acquisition of antibiotic resistance genes and the loss of genes associated with human immune evasion. However, little is known about the dynamics of the MGEs that carry these genes within CC398. Here, we undertake a comprehensive reconstruction of the dynamics of MGEs associated with livestock-associated CC398 in order to better understand the success of this lineage in livestock. We find that three MGEs show a strong association with the transition to livestock, and yet have contrasting dynamics. These dynamics can inform predictions about the risk posed by LA-MRSA spillover infections in humans, and the resilience of antibiotic resistance in LA-MRSA to ongoing changes in antibiotic use in farming.

## Results

### Livestock-associated CC398 emerged between 1957 and 1970

We collected and assembled publicly available whole-genome sequence data from CC398, and sequenced five isolates recently sampled from pig farms in the UK. Our collection includes high-quality whole genome assemblies of 1,180 isolates (including 43 complete reference genomes). This collection spans 15 host species (including humans, pigs, cows, chickens, turkeys and horses), 28 countries (across Europe, America, Asia, and Australasia), and 27 years (1992 to 2018) (Figure S1, Table S1).

We constructed a recombination-stripped maximum likelihood phylogeny of CC398 using reference-mapped assemblies of our collection. We rooted the phylogeny with outgroups from four other *S. aureus* sequence types (STs) in four separate reconstructions. We also constructed a phylogeny from a recombination-stripped concatenated alignment of core genes extracted from *de novo* assemblies, with a midpoint rooting. These reconstructions consistently returned the same topology, and one that is described in previous studies: a livestock-associated clade of CC398 (704 isolates) that falls within a more diverse, and other largely human-associated clade (476 isolates) (Figures 1a and S2) (Price et al. 2012; Silva et al. 2017).

We used the temporal structure in our collection to date the origin of the livestock-associated clade. Due to the size of our collection, we constructed dated phylogenies from three subsampled data sets, each of which includes 250 isolates. Our estimates of the evolutionary rate were consistent across all reconstructions ( $1.1\text{-}1.6 \times 10^{-6}$  subs/site/year),

and similar to estimates from previous studies of CC398 (Ward et al. 2014) and other *S. aureus* CCs (Hsu et al. 2015). This led to an estimate of the origin of the livestock-associated clade of approximately 1964 (95% CI: 1957-1970) (Figures 1b, S3 and S4).

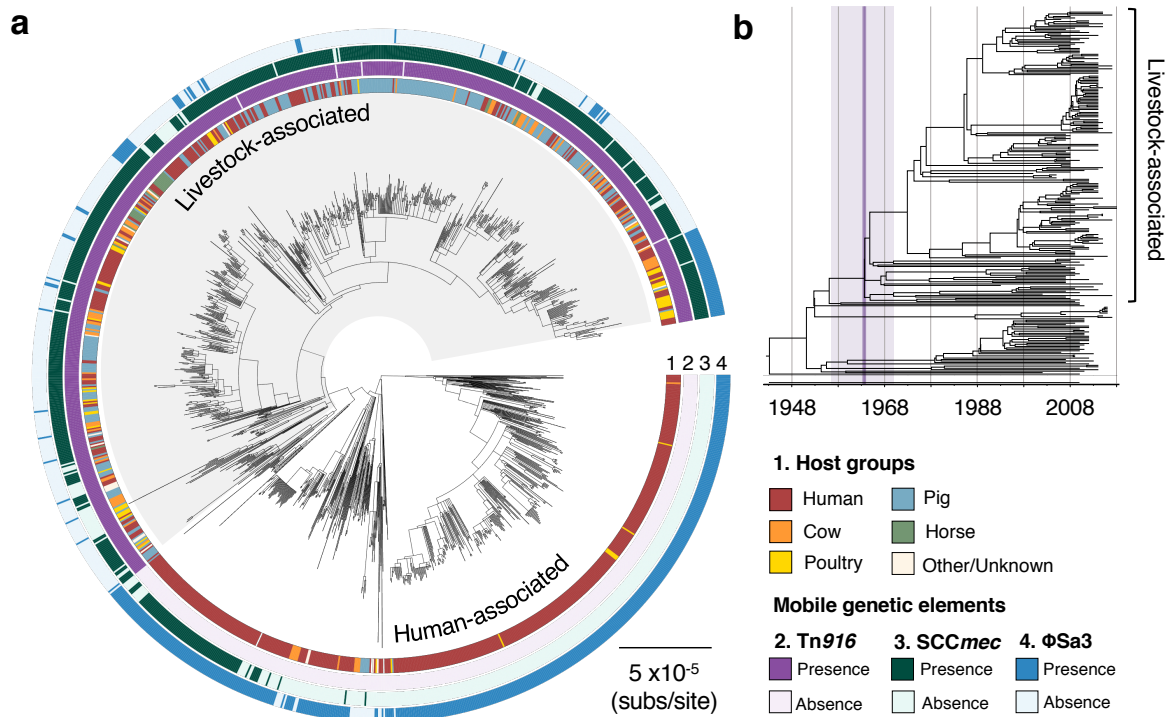

**Figure 1. The transition to livestock-association in the 1960s was accompanied by changes in the frequencies of three mobile genetic elements.** (a) A maximum likelihood phylogeny of 1,180 isolates of CC398, rooted using an outgroup from ST291. Grey shading indicates the livestock-associated clade. Outer rings describe (1) the host groups isolates were sampled from, and the presence of three MGEs: (2) a Tn916 transposon carrying *tetM*, (3) a SCCmec carrying *mecA*, and (4) a  $\phi$ Sa3 prophage carrying a human immune evasion gene cluster. (b) A dated phylogeny of a sample of 250 CC398 isolates, that shows livestock-associated CC398 originated around 1964 (95% HPD: 1957-1970).

### The transition to livestock-association is associated with changes in the frequencies of three mobile genetic elements with very different dynamics

Comparisons of the genomes of isolates from human- and livestock-associated CC398, have previously indicated that the transition to livestock was associated with the acquisition of genes associated with both tetracycline and methicillin resistance (*tetM* and *mecA*), and the loss of genes associated with human immune evasion (the immune evasion gene cluster) (Price et al. 2012). Our analyses of this larger collection are broadly consistent with

this. We find that the genes whose presence most strongly distinguishes isolates from the human- and livestock-associated groups are associated with three categories of MGEs: (1) a *Tn916* transposon carrying *tetM*; (2) *SCCmec* carrying *mecA*; and (3)  $\phi$ Sa3 prophages carrying a human immune evasion gene cluster (Figures 1a and S5, Table S2). Genes associated with the *Tn916* transposon and *SCCmec* elements are more common in the livestock-associated clade, while the reverse is true of genes associated with  $\phi$ Sa3 prophages.

### 1. Stable maintenance of a *Tn916* transposon carrying *tetM*

We identified a contiguous assembly of a *Tn916* transposon carrying *tetM* in 699/704 isolates in our collection of livestock-associated CC398 (Figure 2a, Tables S3 and S4) (de Vries et al. 2009; Roberts and Mullany 2009). Several lines of evidence indicate that the presence of the *Tn916* transposon in livestock-associated CC398 is the result of a single integration event, followed by stable vertical inheritance. First, the location of the transposon in the genome of livestock-associated CC398 is conserved (*Tn916* is always found next to the same core gene; WP\_000902814 in the published annotation of S0385). Second, an alignment of the coding regions of this element (extracted from *de novo* assemblies) shows a similar average nucleotide diversity to core genes (Figure 2d). Third, a phylogeny constructed from the genes in this element is entirely congruent with the phylogeny of livestock-associated CC398 (Figure 2b,c).

Our analyses indicate that the *Tn916* transposon has been maintained in livestock-associated CC398 since its origin, and therefore for around 57 years (Figure 1b). Nevertheless, its absence from 5/704 livestock-associated CC398 isolates in our collection suggests that it remains capable of excision. None of the genes associated with this element are present in these five isolates, and in two we were able to identify an intact integration site in the assembled genome (Figure S6). These five isolates are broadly distributed across the livestock-associated clade, and not linked to a particular host species or geographic location.

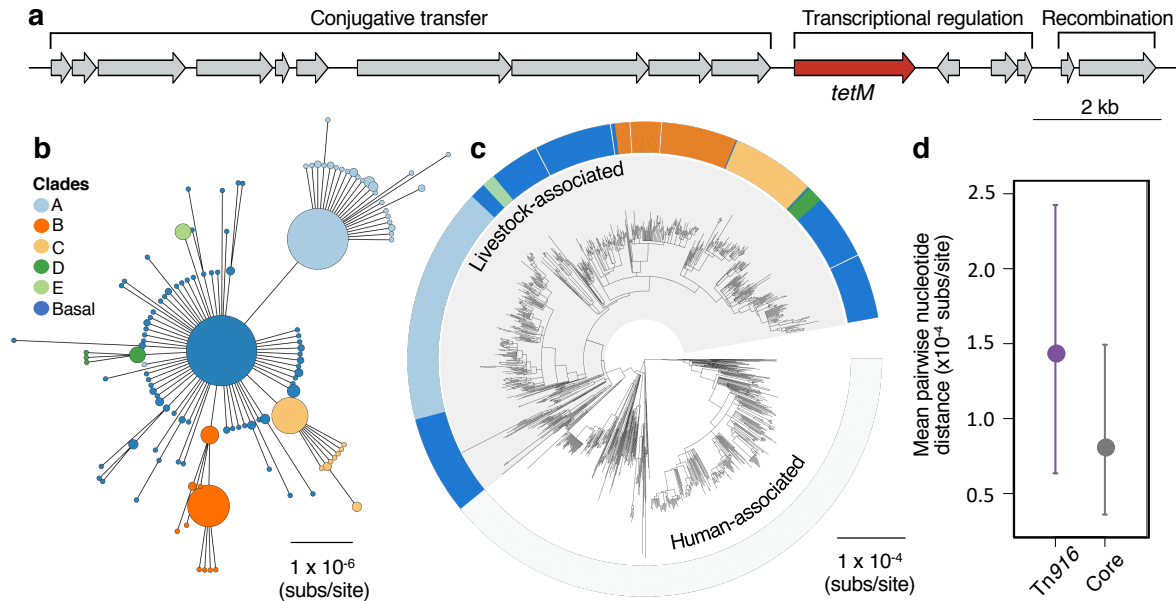

**Figure 2. A Tn916 transposon carrying *tetM* has been stably maintained by livestock-associated CC398 since its origin.** (a) A gene map of the Tn916 transposon in CC398 (based on reference genome 1\_1439), with annotations based on previous studies (de Vries et al. 2009; Roberts and Mullany 2009). (b) A minimum spanning tree of the element based on a concatenated alignment of all genes shown in (a). Points represent groups of identical elements, with point size correlated with number of elements on a log-scale, and colours representing well-supported clades (>70 bootstrap support in a maximum likelihood phylogeny) that include >10 elements (smaller clades are incorporated into their basal clade). (c) These clades are annotated onto the CC398 phylogeny as an external ring. (d) Mean pairwise nucleotide distance between isolates carrying the Tn916 transposon based on genes in the Tn916 transposon and core genes, using bootstrapping to estimate error (see methods for details).

## 2. More variable maintenance of a SCCmec carrying *mecA*, *tetK* and *czrC*

Previous studies suggest that LA-MRSA CC398 emerged from human-associated MSSA (Price et al. 2012). However, the presence of SCCmec elements in recently sampled human-associated CC398 isolates that fall basal to the livestock-associated clade, including clinical isolates from China (He et al. 2018; Zou et al. 2021), Denmark (Møller et al. 2019), and New Zealand (Silva et al. 2017), makes the association between methicillin-resistance and livestock-association less clear (Figure 1a).

SCCmec elements in *S. aureus* are categorised into several types (Hanssen and Ericson Sollid 2006). Consistent with previous studies of CC398 (e.g. Price et al. 2012), we observe both type V (76%) and type IV (21%) in CC398 (we were unable to confidently type the

remaining 3%; Figures 3c and S7, Tables S3 and S5). Most of the type V *SCCmec* elements belong to the subtype Vc previously described in livestock-associated CC398 (Li et al. 2011; Price et al. 2012; Vandendriessche et al. 2014). This element includes two additional resistance genes: *tetK* (tetracycline resistance) and *czrC* (heavy metal resistance) (Figure 3a, Table S6). We identified a full-length version of this element in 335 genomes (including some of the most recent isolates in our collection, sampled from UK pig farms in 2018) and shorter type V elements in 204 genomes. Full-length versions are only observed in the livestock-associated clade, while shorter versions are found in both livestock- and human-associated groups of CC398. Shorter versions often lacked *tetK* (n=90) and *czrC* (n=117) genes (Figure S8). Type IV elements are only observed in the livestock-associated clade. They include subtypes IVa and IVc, and all only carry a single resistance gene: *mecA*.

While type Vc is the most common *SCCmec* in our collection of livestock-associated CC398, this largely reflects isolates from pigs. Type Vc *SCCmec* is much more common in pigs (77% of isolates; n=286) than type IV *SCCmec* (7% of isolates). In cows (n=74) the difference is reduced: 45% are type Vc and 32% are type IV. And in isolates from other animal species (n=94) type IV elements (55%) are more common than type Vc (33%).

Diversity within the type Vc *SCCmec* element indicates that a full-length type Vc *SCCmec* was acquired once by livestock-associated CC398, and has been maintained within CC398 largely through vertical transmission. First, low nucleotide diversity within full-length versions of the element is consistent with 329/335 sharing a recent origin common within livestock-associated CC398 (Figure 3d). Second, patterns of diversity are largely congruent with the core genome phylogeny, consistent with vertical inheritance (Figure 3b,c). Third, low nucleotide diversity within genes shared across full- and shorter-length versions of the element are consistent with most shorter-length versions being the result of deletion within livestock-associated CC398 (Figure S8). In contrast, diversity in the type IV elements in livestock-associated CC398 supports four independent acquisitions from outside of CC398 (Figure S9). Similar to the type Vc element, once acquired, these elements tend to be maintained.



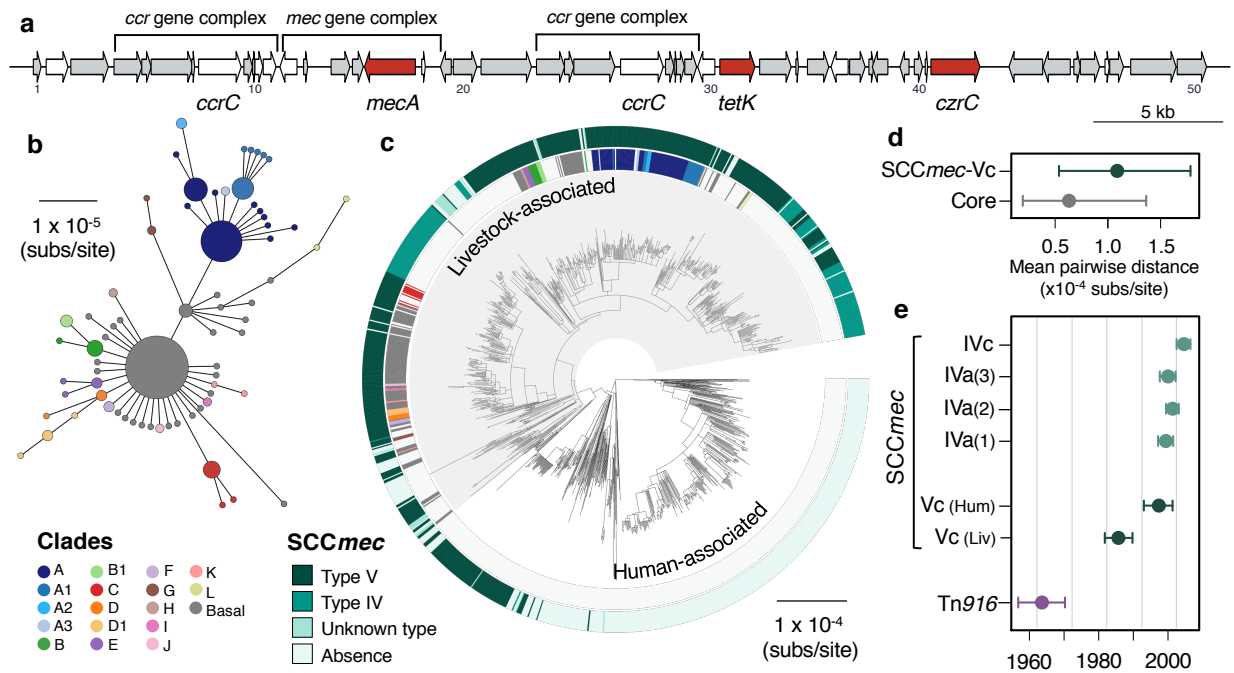

**Figure 3. A type V *SCCmec* has been maintained since the 1980s, with occasional replacements.** (a) A gene map of the type Vc *SCCmec* element in CC398 (using the 1\_1439 reference strain), with annotations from previous studies (Li et al. 2011; Vandendriessche et al. 2014). Genes in white were excluded from analyses of diversity within the element due to difficulties in distinguishing homologues. (b) A minimum-spanning tree of the type Vc *SCCmec* element based on a concatenated alignment of the genes (grey and red) in (a). Points represent groups of identical elements, point size correlates with group size on a log-scale, and colours represent well-supported clades (>70 bootstrap support in a maximum likelihood phylogeny). (c) Well-supported clades and *SCCmec* type are annotated on the CC398 phylogeny in external rings. (d) Mean pairwise nucleotide distance between isolates carrying the *SCCmec* type Vc based on genes in the *SCCmec* type Vc and core genes, with error estimated by bootstrapping (see methods for details). (e) Acquisition dates for different *SCCmec* elements and Tn916 inferred from an ancestral state reconstruction over the dated phylogeny in 1 (b). Dates for type Vc are shown for both livestock and human-associated CC398.

While the *SCCmec* elements carried by human-associated CC398 are always type V, 70/80 fall within a single clade from a hospital outbreak in Denmark in 2016 (Møller et al. 2019). They show a truncation relative to the full-length type Vc that is also observed in 3 isolates from livestock-associated CC398 (leading to the absence of *czrC*, Figure S8). Pairwise nucleotide distances between these 70 human-associated CC398 elements and the full-length type Vc in livestock-associated CC398 are consistent with a recent common ancestor within CC398. In contrast, nucleotide diversity within the other 10 type V *SCCmec* in human-

associated CC398 and distances from the livestock-associated CC398 type Vc indicate multiple independent acquisitions from outside of CC398 (Figure S8).

Using our dated phylogeny of CC398 and categorisation of SCC*mec* based on diversity within the elements, we inferred the dynamics of gain and loss within CC398 (Figures 3e and S10). These reconstructions consistently estimated that the type Vc SCC*mec* had been acquired by livestock-associated CC398 by around 1986 (95% CI: 1982-1990), and has therefore been maintained within livestock-associated CC398 for around 35 years. While the diversity within this element indicates a single acquisition by CC398, these reconstructions indicate multiple gains, likely reflecting horizontal transmission within CC398. They also indicate that the acquisition by livestock-associated CC398 predated the acquisition by human-associated CC398, consistent with transmission from livestock-associated CC398 to human-associated CC398. In contrast, type IV elements show evidence of several more recent acquisitions in relatively quick succession between 1997 and 2004 (Figures 3e and S10).

Together, our analyses are consistent with LA-MRSA emerging from human-associated MSSA and acquiring the type Vc SCC*mec* element following its initial diversification. The element has been stably maintained (particularly in pigs), although with several exceptions - including deletions of parts of the element and replacements with smaller type IV SCC*mec*.

### *3. Loss of a $\phi$ Sa3 prophage carrying a human immune evasion gene cluster, but with frequent reacquisition*

In contrast to the maintenance of Tn916 and SCC*mec* type V in the livestock-associated clade, the  $\phi$ Sa3 prophage is highly dynamic.  $\phi$ Sa3 prophages carry human immune evasion gene clusters that include a variable set of functional genes that encode human-specific virulence factors, including *sak*, *chp*, *scn*, *sea* and *sep* (Gladysheva et al. 2003; Postma et al. 2004; Rooijackers et al. 2005; van Wamel et al. 2006; Thammavongsa et al. 2015; van Alen et al. 2018). They are temperate prophages that integrate into the *hly* gene of *S. aureus*. While  $\phi$ Sa3 prophages are present in 88% of our human-associated CC398 isolates, we find that this is not a consequence of a stable association between CC398 and one prophage. Nucleotide diversity within genes shared across  $\phi$ Sa3 prophages (Figure 4, Table S3), suggest at least seven (but likely more) acquisitions of an  $\phi$ Sa3 prophage into human-associated CC398 from outside of CC398. The set of functional genes carried by these elements indicate that the elements within human-associated CC398 include types C

(n=285), B (n=111), E (n=35), A (n=4) and D (n=4), and those carried by livestock-associated CC398 isolates include types B (n=84), E (n=8) and A (n=5) (van Wamel et al. 2006; van Alen et al. 2018).

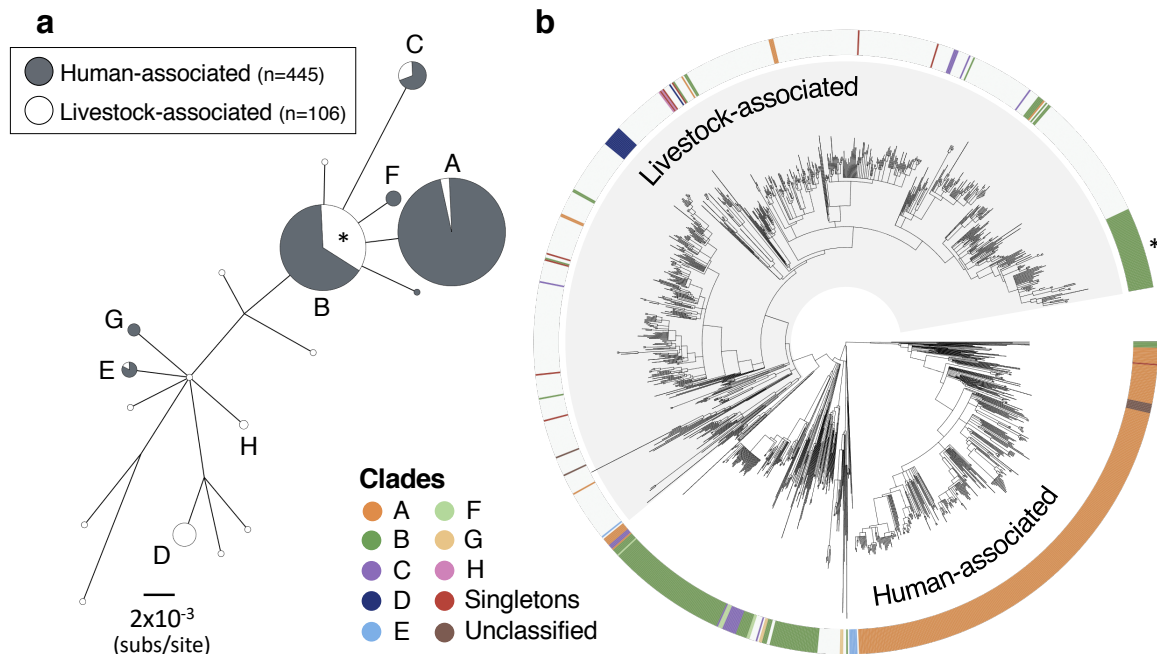

**Figure 4.  $\phi$ Sa3 prophages have been lost and acquired multiple times in both human-associated and livestock-associated CC398.** (a) A maximum likelihood phylogeny based on 12 genes shared across the  $\phi$ Sa3 prophages in our collection, with both low-support nodes (<70% bootstrap support) and branches <0.0018 subs/site collapsed. The latter cut-off is a conservative estimate of the maximum distance that could reflect divergence within CC398. It is the maximum pairwise distance between isolates carrying  $\phi$ Sa3 prophages across 1,000 estimates from random samples of a core gene alignment of the same number of sites as is in our  $\phi$ Sa3 prophage alignment. Node size correlates with the number of elements on a log-scale. Elements carried by isolates from human-associated CC398 (grey) and livestock-associated CC398 (white) isolates are indicated, and nodes that include multiple elements labelled (A-E). (b) These clades annotated on the CC398 phylogeny as an external ring. The element carried by the poultry-associated subclade of livestock-associated CC398 is indicated by \*.

While  $\phi$ Sa3 prophages are rare in livestock-associated CC398 (68/704 isolates), diversity within these elements indicate at least 15 (but likely more) acquisitions into livestock-associated CC398. The majority of these elements (69%) do not share a recent common ancestor with those in human-associated CC398.  $\phi$ Sa3 prophages tend to have recent origins in livestock-associated CC398, with a notable exception being a previously described

poultry-associated sub-clade (n=51) (Price et al. 2012; Larsen et al. 2016b; Pérez-Moreno et al. 2017; Tang et al. 2017). In our collection, 39% of the isolates in this clade are from poultry (compared to 4% across the rest of the livestock-associated clade). Low nucleotide diversity within the type B  $\phi$ Sa3 consistently present in isolates within this clade, suggests that it has been maintained since its acquisition approximately 21 years ago (95% CI: 1997-2001; Figures 1b and S11).

### **Distinct route to multi-drug resistance in livestock-associated CC398**

Livestock-associated CC398 is frequently multi-drug resistant. We see evidence of this in our data set where 81% of livestock-associated CC398 isolates carry one or more resistance genes for antibiotic classes other than tetracyclines and  $\beta$ -lactams (Figures S12 and S13, Table S7). 67% of livestock-associated CC398 isolates have genes associated with trimethoprim resistance (*dfrA*, *dfrK* or *dfrG*), 42% have genes associated with macrolide resistance (*ermA*, *ermB*, *ermC* or *ermT*), and 26% have genes associated with aminoglycoside resistance (*aadA*, *aphA* or *aphD*). Not only are resistance genes less common in human-associated CC398 (only 20% of isolates carry tetracycline resistance genes, and 9% carry trimethoprim resistance genes), they also differ in their relative frequencies. In particular, human-associated CC398 isolates more commonly carry genes associated with macrolide resistance (91%).

### **Spillover of livestock-associated CC398 into humans is associated with the acquisition of $\phi$ Sa3 prophages, but not a loss of resistance genes**

$\phi$ Sa3 prophages are more common in human isolates (23%) than in livestock or companion animal isolates (11%) in our collection of livestock-associated CC398. To determine the significance of this association, we identified 70 phylogenetically independent clades that include isolates from both human and livestock or companion animal hosts (Figure S14). Comparisons across these groups revealed that isolates from humans are consistently more likely to carry an  $\phi$ Sa3 prophage (McNemar's Chi-squared test:  $p = 0.001$ ; Figure 5).

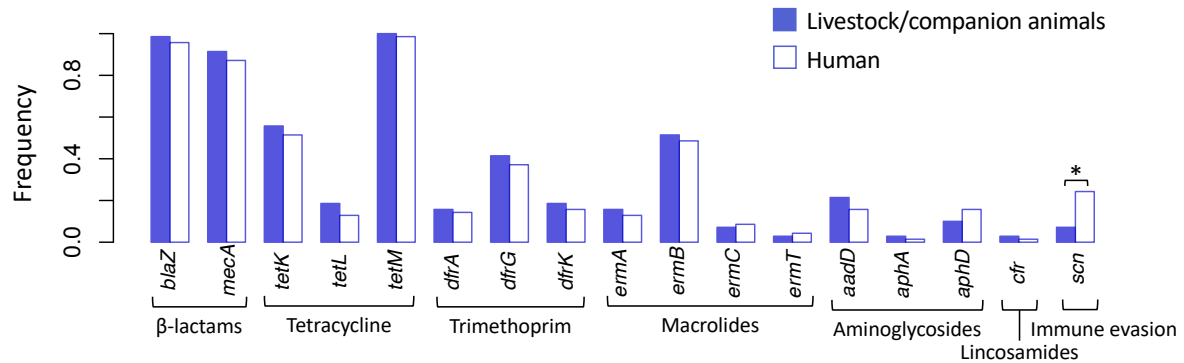

**Figure 5. Spillover of livestock-associated CC398 into humans is associated with acquisition of human immune-evasion genes.** 70 phylogenetically independent clades that include isolates from both humans and other species were identified within the livestock-associated clade. The plot shows the frequency with which these genes were identified within isolates from humans (right, empty bars) and non-human species (left, filled bars) in these groups. An asterisk indicates a significant difference based on McNemar's Chi-squared test ( $p < 0.01$ ). The *scn* gene is always present in the human immune evasion cluster carried by  $\phi$ Sa3 prophages, and therefore represents the presence of this element.

$\phi$ Sa3 prophages are also less common in isolates from pigs than from other non-human species (only 3% of pig isolates carry one). In 42/70 of our phylogenetically independent groups, the only non-human species was a pig, and none of the pig isolates from these groups carried an  $\phi$ Sa3 prophage (while 14% of the human isolates did). In the remaining 28 groups (that included isolates from cows, horses and poultry),  $\phi$ Sa3 prophages were observed in non-human hosts in 17% of groups, but still at a higher frequency in humans (39% of groups) (McNemar's Chi-squared test:  $p = 0.04$ ).

In contrast, we found no evidence that the spillover of livestock-associated CC398 into humans is associated with the loss (or gain) of antibiotic resistance genes (Figure 5). No resistance gene was significantly more or less common in humans than in other species, nor was there a consistent shift in the overall number of resistance genes.

## Discussion

We have characterised the dynamics of the three classes of MGEs that show the greatest changes in frequency across human- and livestock-associated CC398: the Tn916 transposon and the SCC*mec* element, which are both common in livestock-associated CC398, and the  $\phi$ Sa3 prophage, which is common in human-associated CC398. Despite a consistency in the relative frequencies of these elements across CC398, leading to their

strong association with the transition to livestock, these three elements show a broad spectrum of dynamics. The Tn916 transposon carrying *tetM* shows evidence of stable and consistent vertical transmission in livestock-associated CC398 and absence from human-associated CC398. The type Vc SCC*mec*, carrying not only *mecA*, but also *tetK* and *czrC*, has also been stably maintained by several lineages of livestock-associated CC398, but by a combination of vertical and horizontal transmission, and with occasional replacement with type IV elements. While type V SCC*mec* elements are also present in human-associated CC398, there is little evidence of their longer-term maintenance. Finally, while  $\phi$ Sa3 prophages carrying a human immune-evasion gene cluster are rare in livestock-associated CC398 and common in human-associated CC398, there have been frequent gains and losses in both groups. These contrasting dynamics may reflect variation in the selective benefits, selective costs, and availability of these MGEs.

The Tn916 transposon carrying *tetM* integrated at the origin of CC398 in livestock in 1964 (95% CI: 1957-1970). The stable integration of this transposon could be of considerable benefit to a livestock-associated lineage since tetracyclines are the most commonly used antimicrobial class in livestock farming (WHO 2015; DANMAP 2019). In addition, previous studies have suggested that Tn916 is associated with a low selective burden in the absence of treatment, which could increase its stability (Roberts and Mullany 2009). While Tn916 is found across several bacterial genera (Clewell et al. 1995; Roberts and Mullany 2009), the element is relatively rare in *S. aureus*; while it has been observed in other CCs (5, 40 and 35), there is no evidence of its horizontal transmission within *S. aureus* (de Vries et al. 2009). This combination of high selective benefit, low selective cost and rarity could explain the remarkable stability of Tn916 in livestock-associated CC398, and may partly explain the success of this lineage in livestock.

Our results indicate that the acquisition of an SCC*mec* occurred later in the expansion of livestock-associated CC398. The most common SCC*mec* in livestock-associated CC398, type Vc, carries *tetK* and *czrC* in addition to *mecA*. These additional resistance genes might be highly advantageous in livestock, and particularly in pigs. While all livestock-associated CC398 carry *tetM*, there is evidence that carrying *tetK* in addition to *tetM* is associated with increased fitness during exposure to sublethal concentrations of tetracycline (Larsen et al. 2016a). *czrC* is associated with heavy metal resistance (Cavaco et al. 2010), which is likely to be beneficial in the context of the common supplementation of animal feed with zinc oxide, which in pigs is commonly used to prevent diarrhoea in weaners (Nielsen et al. 2021).

Additionally, *mecA* is likely to be beneficial because of the common use of beta-lactams in livestock farming, including third generation cephalosporins (Sjölund et al. 2016; Lekagul et al. 2019). The size of the type Vc element, combined with the replacements and truncations we observe suggests that it may come with a selective cost. In addition, SCC*mec* type Vc appears to be rare (at least in *S. aureus*). The element has been found in other staphylococci (*S. cohnii* in Vervet Monkeys (Hoefler et al. 2021)), but has not been reported in other *S. aureus* CCs.

Loss of the type Vc SCC*mec* on internal branches within livestock-associated CC398 is associated with replacement with a type IV SCC*mec* that only carries *mecA*. While we find evidence of only a single acquisition of the type Vc SCC*mec* by livestock-associated CC398, we find evidence of at least four acquisitions of type IV SCC*mec*. The more recent dates of acquisition, and an apparent association with livestock species other than pigs, might reflect a difference in selective pressures across different livestock species, or a loss of the type Vc element during transmission between livestock populations. The dynamics of the type Vc SCC*mec* are broadly consistent with a high selective benefit (particularly in pigs), a high cost, and the rarity of this element relative to other SCC*mec*.

While the loss of the  $\phi$ Sa3 prophage is associated with the transition to livestock, neither the loss nor the gain of these elements is likely to be a substantial hurdle for the adaptation of CC398 to human or non-human hosts. Their ubiquity in human-associated CC398 and frequent acquisition following transmission of livestock-associated CC398 to humans (consistent with Sieber et al. 2019), is consistent with a strong benefit in the human host. On the other hand, as we find that these elements are frequently lost and generally absent in other host species, these elements may carry a selective burden outside of the human host. The diversity of  $\phi$ Sa3 prophages present in CC398 suggests they form a large pool of elements (van Alen et al. 2018) that are readily acquired by *S. aureus* in humans.

We observe one clear exception to the pattern of recent acquisitions of  $\phi$ Sa3 in livestock-associated CC398 in response to spillover events: the acquisition of an  $\phi$ Sa3 prophage at the base of a poultry-associated sub-clade of livestock-associated CC398 (Price et al. 2012; Larsen et al. 2016b; Pérez-Moreno et al. 2017; Tang et al. 2017). This clade was first described as a hybrid LA-MRSA CC9/CC398 lineage (Price et al. 2012), and was subsequently investigated as a lineage associated with human disease (Larsen et al. 2016b). The maintenance of an  $\phi$ Sa3 in this lineage may reflect more frequent transmission

via a human host, or an adaptation to poultry (a recent study suggested that  $\phi$ Sa3 prophages might aid immune evasion in species other than humans (Jung et al. 2017)). Either way, this might make this lineage a greater immediate threat to public health.

While livestock-associated CC398 is found across a broad range of livestock species, it is most commonly associated with pigs. The dynamics of the *SCCmec* and  $\phi$ Sa3 prophages that we have identified are both consistent with livestock-associated CC398 originating in pig farms and later spreading to other livestock species. The lower frequency of the type Vc *SCCmec* in species other than pigs could reflect random loss during transmission bottlenecks, or a reduced benefit of either *tetK* or *czcC* in these species. Similarly, the higher frequency of  $\phi$ Sa3 prophages in other species might reflect an increased benefit or reduced cost, or more recent transmission via human hosts.

Our results reveal that LA-MRSA CC398 is a stably antibiotic-resistant pathogen that is capable of dynamic readaptation to humans. This has broad implications for our understanding of the risk posed by LA-MRSA to public health. In particular, the stability of Tn916 and *SCCmec* in livestock-associated CC398 across different livestock species and countries suggests that these elements are capable of maintenance across variable levels and types of antibiotic exposure. While *SCCmec* is less stably maintained than Tn916, our identification of several independent acquisitions of type IV *SCCmec* suggests both a strong selective benefit, not contingent on the carriage of *tetK* and *czcC*, and an availability of type IV elements. These dynamics predict that gradual reductions in antibiotic consumption and the forthcoming EU ban on medical zinc supplementation in pig feed (European Medicines Agency 2017, 2020; DANMAP 2019) may have a limited impact on LA-MRSA. Further work is, however, required to understand the factors that underlie the acquisition and maintenance of resistance genes within LA-MRSA, and how they differ from human-associated MRSA lineages.



## Methods

### Data collection

All available genome sequence data relating to *S. aureus* CC398 was downloaded from public databases ([www.ncbi.nlm.nih.gov/sra](http://www.ncbi.nlm.nih.gov/sra) and [www.ebi.ac.uk/ena](http://www.ebi.ac.uk/ena); accessed 2019), with metadata in some cases obtained by request (Table S1). We additionally sequenced five isolates sampled from UK pig farms in 2018. All publicly available complete *S. aureus* genomes assemblies ([www.ncbi.nlm.nih.gov](http://www.ncbi.nlm.nih.gov); accessed 2019) were MLST typed using Pathogenwatch (<https://pathogen.watch>), and the 43 genomes identified as CC398 were added to our collection. After exclusion of low-quality assemblies and isolates mischaracterised as CC398, this led to a collection of 1,180 genomes.

### Genomic library preparation and sequencing

For sequencing of the five UK pig farm isolates, genomic DNA was extracted from overnight cultures grown in TSB at 37°C with 200rpm shaking using the MasterPure Gram Positive DNA Purification Kit (Cambio, UK). Illumina library preparation and Hi-Seq sequencing were carried out as previously described (Harrison et al. 2013).

### Genome assembly

We used sequence data from all isolates to generate *de novo* assemblies with *Spades* v.3.12.0 (Bankevich et al. 2012). We removed adapters and low quality reads with *Cutadapt* v1.16 (Martin 2011) and *Sickle* v1.33 (Joshi and Fass 2011), and screened for contamination using *FastQ Screen* (Wingett and Andrews 2018). Optimal k-mers were identified based on average read lengths for each genome. All assemblies were evaluated using *QUAST* v.5.0.1 (Gurevich et al. 2013) and we mapped reads back to *de novo* assemblies to investigate polymorphism (indicative of mixed cultures) using *Bowtie2* v1.2.2 (Langmead and Salzberg 2012). Low quality genome assemblies were excluded from further analysis (i.e., N50 <10,000, contigs smaller than 1kb contributing to >15% of the total assembly length, total assembly length outside of the median sequence length +/- one standard deviation, or >1,500 polymorphic sites). We identified genomes mischaracterised as CC398 via two approaches and excluded them from further analysis. First, we identified sequence types (STs) with *MLST-check* (Page et al. 2016) and grouped into CCs using the *eBURST* algorithm with a single locus variant (Francisco et al. 2009). Second, we constructed a neighbour-joining tree based on a concatenated alignment of MLST genes (*arcC*, *aroE*, *glpF*, *gmk*, *pta*, *tpi* and *yqiL*) for our collection and 13 additional reference

genomes from other CCs, using the *ape* package in *R* and a K80 substitution model (Paradis et al. 2004).

We generated reference-mapped assemblies with *Bowtie2* using the reference genome S0385 (*GenBank* accession no. AM990992). For reference genomes, we generated artificial FASTQ files with *ArtificialFastqGenerator* (Frampton and Houlston 2012). Average coverage and number of missing sites in these assemblies were used as an additional quality control measure; genomes with average coverage <50x or with >10% missing sites were excluded.

We identified recombination in the reference-mapped alignment using both *Gubbins* v2.3.1 (Croucher et al. 2015) and *ClonalFrame* (Didelot and Wilson 2015). We masked all the recombinant sites identified from our alignment. We additionally masked a region of ~123 kb that was identified as horizontally acquired from an ST9 donor in a previous study (Price et al. 2012).

### **Genome annotation and identification of homologous genes**

We annotated *de novo* assemblies with *Prokka* v2.8.2 (Seemann 2014) and identified orthologous genes with *Roary* (Page et al. 2015) using recommended parameter values. We created a core gene alignment with *Roary* and identified recombinant sites using *Gubbins*. We identified antibiotic resistance genes using the *Pathogenwatch* AMR prediction module (Wellcome Sanger Institute), which uses *BLASTn* (Altschul et al. 1990) with a cut-off of 75% coverage and 80-90% percent identity threshold (depending on the gene) against a *S. aureus* AMR database.

### **Phylogenetic analyses**

We carried out phylogenetic reconstruction for the reference-mapped alignment with *RAxML* v8.2.4 using the *GTR+ $\Gamma$*  model and 1,000 bootstraps (Stamatakis 2014). Sites where >0.1% of genomes showed evidence of recombination or had missing data were excluded from the analysis. We constructed dated phylogenies using *BEAST* v1.10 with a *HKY+ $\Gamma$*  model, a strict molecular clock, and constant population size coalescent prior, from the coding regions of the reference-mapped alignment (Drummond et al. 2012). We fit separate substitution models and molecular clocks to 1st/2nd and 3rd codon positions to reflect differences in selective constraint. We constructed phylogenies for three random subsamples of 250 isolates (200 from livestock-associated CC398 and 50 from human-associated CC398). Subsamples were non-overlapping with the exception of 30 genomes representing the most divergent lineages

within the livestock-associated clade, to ensure a consistent description the origin of this clade. We constructed additional phylogenies from subsamples that included only isolates from the LA-clade to establish that consistent rate estimates were returned over different evolutionary depths. We investigated temporal signal in each data set through a regression of root-to-tip distance against sampling date, and a permutation test of dates over tips (with clustering used to correct for any confounding of temporal and genetic structures) (Murray et al. 2016; Rambaut et al. 2016). Trees are visualized and annotated using *ITOL* (Letunic and Bork 2021).

### **Comparative analyses of mobile genetic elements**

Genes associated with the transition to livestock were identified through comparing frequencies of homologous genes identified with *Roary* across human- and livestock-associated CC398. We investigated the association between these genes and MGEs through analysis of (i) physical locations within our *de novo* assemblies and the reference genomes, (ii) correlations in their presence/absence across our collection, and (iii) comparison with descriptions in the literature and in online databases of particular MGEs.

We confirmed the identity of the Tn916 transposon by comparison with published descriptions and publicly available annotated sequences. *SCCmec* elements were initially categorised into types using a *BLASTn* search of all representative *SCCmec* types from the *SCCmecFinder* database in our *de novo* assemblies (Table S5) (Hanssen and Ericson Sollid 2006).  $\phi$ Sa3 prophages were initially identified and categorised through identification of functional genes associated with the human immune evasion gene cluster. To further characterise diversity within these elements we identified genes associated with each element across our collection. We constructed alignments of genes within MGEs using *Clustal Omega* v1.2.3 (Sievers and Higgins 2018) and checked for misalignment by eye.

We analysed variation in both gene content and nucleotide diversity within shared genes for each MGE. We estimated pairwise nucleotide distances in concatenated alignments of shared genes for each type of element using the *ape* package in *R* (Paradis et al. 2004), and constructed maximum likelihood trees using *RaxML* and minimum spanning trees using *GrapeTree* (Zhou et al. 2018) to investigate co-phylogeny. We generated confidence intervals for our estimates of mean pairwise nucleotide distances within MGEs by re-estimating the mean distance from 1,000 bootstrapped samples of sites. We compared this to sites in the core genome by sampling the same number of sites as were in the MGE alignment from a concatenated alignment of core genes (generated by *Roary*). For *SCCmec*

we used ancestral state reconstruction in *BEAST* to infer the evolutionary dynamics of these elements and date their origins within CC398. This involved fitting a discrete traits model to the posterior distributions of trees, with each state representing a version of the element that had been independently acquired by CC398. We used a strict clock model that allowed for asymmetric rates of transitions between states, but we found that the results were robust to use of a symmetric model or a relaxed clock

### **Phylogenetically independent groups**

To test the association between spillover into the human host and the presence of  $\phi$ Sa3 prophages and antibiotic-resistance genes, we identified 70 phylogenetically independent clades of isolates that were sampled from both human and non-human hosts in the livestock-associated clade. We classed a gene as present in a host if it was observed in any of the isolates from that host in that clade.

### **Ethics approval and consent to participate**

Not applicable.

### **Consent for publication**

Not applicable.

### **Availability of data and materials**

The Illumina sequences generated in this study have been deposited in the NCBI short read archive under the accession numbers ERR3524650, ERR3524328, ERR3524354, ERR3524446 and ERR3524562. All other sequences used in this study are publicly available and their origins are described in Table S1.

### **Competing interests**

The authors declare that they have no competing interests.

### **Acknowledgements**

MM was funded by the Medical Research Council, co-funded by the Raymond and Beverly Sackler Fund. GGRM and LAW were supported by a Sir Henry Dale Fellowship jointly funded by the Wellcome Trust and the Royal Society (109385/Z/15/Z). GGRM was also supported by a ZELS BBSRC award (BB/L018934/1) and a Research Fellowship at Newnham College.

## Authors' contributions

MM collected and assembled all the data used in this study. XB and RW sampled and sequenced the five new isolates from UK farms. LAW and MAH conceived the project. MM and GGRRM designed and performed the phylogenetic and comparative genomic analyses. GGRRM, MM and LAW wrote the manuscript, with input from all other authors.

## References

- van Alen S., Ballhausen B., Kaspar U., Köck R., Becker K. 2018. Prevalence and genomic structure of bacteriophage phi3 in human-derived livestock-associated methicillin-resistant *Staphylococcus aureus* isolates from 2000 to 2015. *Journal of Clinical Microbiology*. 56.
- van Alen S., Ballhausen B., Peters G., Friedrich A.W., Mellmann A., Köck R., Becker K. 2017. In the centre of an epidemic: Fifteen years of LA-MRSA CC398 at the University Hospital Münster. *Veterinary Microbiology*. 200:19–24.
- Altschul S.F., Gish W., Miller W., Myers E.W., Lipman D.J. 1990. Basic local alignment search tool. *Journal of Molecular Biology*. 215:403–410.
- Anjum M.F., Marco-Jimenez F., Duncan D., Marín C., Smith R.P., Evans S.J. 2019. Livestock-Associated Methicillin-Resistant *Staphylococcus aureus* From Animals and Animal Products in the UK. *Frontiers in Microbiology*. 10.
- Bankevich A., Nurk S., Antipov D., Gurevich A.A., Dvorkin M., Kulikov A.S., Lesin V.M., Nikolenko S.I., Pham S., Prjibelski A.D., Pyshkin A. v., Sirotkin A. v., Vyahhi N., Tesler G., Alekseyev M.A., Pevzner P.A. 2012. SPAdes: A New Genome Assembly Algorithm and Its Applications to Single-Cell Sequencing. *Journal of Computational Biology*. 19:455.
- Brockhurst M.A., Harrison E., Hall J.P.J., Richards T., McNally A., MacLean C. 2019. The Ecology and Evolution of Pangenomes. *Current Biology*. 29:R1094–R1103.
- Cavaco L.M., Hasman H., Stegger M., Andersen P.S., Skov R., Fluit A.C., Ito T., Aarestrup F.M. 2010. Cloning and occurrence of *cztC*, a gene conferring cadmium and zinc resistance in methicillin-resistant *Staphylococcus aureus* CC398 isolates. *Antimicrobial Agents and Chemotherapy*. 54:3605–3608.
- Clewell D.B., Flannagan S.E., Jaworski D.D., Clewell D.B. 1995. Unconstrained bacterial promiscuity: the Tn916–Tn1545 family of conjugative transposons. *Trends in Microbiology*. 3:229–236.
- Croucher N.J., Page A.J., Connor T.R., Delaney A.J., Keane J.A., Bentley S.D., Parkhill J., Harris S.R. 2015. Rapid phylogenetic analysis of large samples of recombinant bacterial whole genome sequences using Gubbins. *Nucleic Acids Research*. 43:e15–e15.
- DANMAP. 2019. DANMAP: the Danish Programme for surveillance of antimicrobial consumption and resistance in bacteria from food animals, food and humans. Available from <https://www.danmap.org/Reports/2019>.
- Didelot X., Wilson D.J. 2015. ClonalFrameML: Efficient Inference of Recombination in Whole Bacterial Genomes. *PLoS Computational Biology*. 11.
- Drummond A.J., Suchard M.A., Xie D., Rambaut A. 2012. Bayesian Phylogenetics with BEAUti and the BEAST 1.7. *Molecular Biology and Evolution*. 29:1969–1973.

- European Medicines Agency. 2017. Zinc oxide. Available from <https://www.ema.europa.eu/en/medicines/veterinary/referrals/zinc-oxide>.
- European Medicines Agency. 2020. European Surveillance of Veterinary Antimicrobial Consumption. Available from <https://www.ema.europa.eu>.
- Frampton M., Houlston R. 2012. Generation of Artificial FASTQ Files to Evaluate the Performance of Next-Generation Sequencing Pipelines. PLOS ONE. 7:e49110.
- Francisco A.P., Bugalho M., Ramirez M., Carriço J.A. 2009. Global optimal eBURST analysis of multilocus typing data using a graphic matroid approach. BMC Bioinformatics 2009 10:1. 10:1–15.
- Frost L.S., Leplae R., Summers A.O., Toussaint A. 2005. Mobile genetic elements: the agents of open source evolution. Nature Reviews Microbiology. 3:722–732.
- Gladysheva I.P., Turner R.B., Sazonova I.Y., Liu L., Reed G.L. 2003. Coevolutionary patterns in plasminogen activation. Proceedings of the National Academy of Sciences. 100:9168–9172.
- Gurevich A., Saveliev V., Vyahhi N., Tesler G. 2013. QUAST: quality assessment tool for genome assemblies. Bioinformatics. 29:1072–1075.
- Haag A.F., Fitzgerald J.R., Penadés J.R. 2019. Staphylococcus aureus in Animals . Microbiology Spectrum. 7.
- Hanssen A.-M., Ericson Sollid J.U. 2006. SCCmec in staphylococci: genes on the move. FEMS Immunology & Medical Microbiology. 46:8–20.
- Harrison E.M., Paterson G.K., Holden M.T.G., Larsen J., Stegger M., Larsen A.R., Petersen A., Skov R.L., Christensen J.M., Zeuthen A.B., Heltberg O., Harris S.R., Zadoks R.N., Parkhill J., Peacock S.J., Holmes M.A. 2013. Whole genome sequencing identifies zoonotic transmission of MRSA isolates with the novel *mecA* homologue *mecC*. EMBO Molecular Medicine. 5:509–515.
- He L., Zheng H.-X., Wang Y., Le K.Y., Liu Q., Shang J., Dai Y., Meng H., Wang X., Li T., Gao Q., Qin J., Lu H., Otto M., Li M. 2018. Detection and analysis of methicillin-resistant human-adapted sequence type 398 allows insight into community-associated methicillin-resistant *Staphylococcus aureus* evolution. Genome Medicine. 10.
- Hoefler A., Boyen F., Beierschmitt A., Moodley A., Roberts M.C., Butaye P. 2021. Methicillin-Resistant and Methicillin-Susceptible *Staphylococcus* from Vervet Monkeys (*Chlorocebus sabaeus*) in Saint Kitts. Antibiotics. 10.
- Hsu L.-Y., Harris S.R., Chlebowicz M.A., Lindsay J.A., Koh T.-H., Krishnan P., Tan T.-Y., Hon P.-Y., Grubb W.B., Bentley S.D., Parkhill J., Peacock S.J., Holden M.T. 2015. Evolutionary dynamics of methicillin-resistant *Staphylococcus aureus* within a healthcare system. Genome Biology 2015 16:1. 16:1–13.
- Islam M.Z., Espinosa-Gongora C., Damborg P., Sieber R.N., Munk R., Husted L., Moodley A., Skov R., Larsen J., Guardabassi L. 2017. Horses in Denmark Are a Reservoir of Diverse Clones of Methicillin-Resistant and -Susceptible *Staphylococcus aureus*. Frontiers in Microbiology. 0:543.
- Jamrozny D., Coll F., Mather A.E., Harris S.R., Harrison E.M., MacGowan A., Karas A., Elston T., Estée Török M., Parkhill J., Peacock S.J. 2017. Evolution of mobile genetic element composition in an epidemic methicillin-resistant *Staphylococcus aureus*: temporal changes correlated with frequent loss and gain events. BMC Genomics 2017 18:1. 18:1–12.
- Joshi N., Fass J. 2011. Sickle: a sliding-window, adaptive, quality-based trimming tool for FastQ files.

- Jung P., Abdelbary M.M.H., Kraushaar B., Fetsch A., Geisel J., Herrmann M., Witte W., Cuny C., Bischoff M. 2017. Impact of bacteriophage Saint3 carriage on the immune evasion capacity and hemolytic potential of *Staphylococcus aureus* CC398. *Veterinary Microbiology*. 200:46–51.
- Langmead B., Salzberg S.L. 2012. Fast gapped-read alignment with Bowtie 2. *Nature Methods* 2012 9:4. 9:357–359.
- Larsen J., Clasen J., Hansen J.E., Paulander W., Petersen A., Larsen A.R., Frees D. 2016a. Copresence of tet(K) and tet(M) in livestock-associated methicillin-resistant *Staphylococcus aureus* clonal complex 398 is associated with increased fitness during exposure to sublethal concentrations of tetracycline. *Antimicrobial Agents and Chemotherapy*. 60:4401–4403.
- Larsen J., Petersen A., Larsen A.R., Sieber R.N., Stegger M., Koch A., Aarestrup F.M., Price L.B., Skov R.L., Group for the D.M.S. 2017. Emergence of Livestock-Associated Methicillin-Resistant *Staphylococcus aureus* Bloodstream Infections in Denmark. *Clinical Infectious Diseases: An Official Publication of the Infectious Diseases Society of America*. 65:1072.
- Larsen J., Stegger M., Andersen P.S., Petersen A., Larsen A.R., Westh H., Agersø Y., Fetsch A., Kraushaar B., Käsbohrer A., Feßler A.T., Schwarz S., Cuny C., Witte W., Butaye P., Denis O., Haenni M., Madec J.-Y., Jouy E., Laurent F., Battisti A., Franco A., Alba P., Mammina C., Pantosti A., Monaco M., Wagenaar J.A., de Boer E., van Duijkeren E., Heck M., Domínguez L., Torres C., Zarazaga M., Price L.B., Skov R.L. 2016b. Evidence for Human Adaptation and Foodborne Transmission of Livestock-Associated Methicillin-Resistant *Staphylococcus aureus*. *Clinical Infectious Diseases*. 63:1349–1352.
- Lekagul A., Tangcharoensathien V., Yeung S. 2019. Patterns of antibiotic use in global pig production: A systematic review. *Veterinary and Animal Science*. 7:100058.
- Lekkerkerk W.S.N., van Wamel W.J.B., Snijders S. v., Willems R.J., van Duijkeren E., Broens E.M., Wagenaar J.A., Lindsay J.A., Vos M.C. 2015. What is the origin of livestock-associated methicillin-resistant *Staphylococcus aureus* clonal complex 398 isolates from humans without livestock contact? An epidemiological and genetic analysis. *Journal of Clinical Microbiology*. 53:1836–1841.
- Letunic I., Bork P. 2021. Interactive Tree Of Life (iTOL) v5: an online tool for phylogenetic tree display and annotation. *Nucleic Acids Research*. 49:W293–W296.
- Li S., Skov R.L., Han X., Larsen A.R., Larsen J., Sørup M., Wulf M., Voss A., Hiramatsu K., Ito T. 2011. Novel Types of Staphylococcal Cassette Chromosome *mec* Elements Identified in Clonal Complex 398 Methicillin-Resistant *Staphylococcus aureus* Strains. *Antimicrobial Agents and Chemotherapy*. 55:3046.
- Martin M. 2011. Cutadapt removes adapter sequences from high-throughput sequencing reads. *EMBnet.journal*. 17:10–12.
- Matuszewska M., Murray G.G.R., Harrison E.M., Holmes M.A., Weinert L.A. 2020. The Evolutionary Genomics of Host Specificity in *Staphylococcus aureus*. *Trends in Microbiology*. 28:465–477.
- Møller J.K., Larsen A.R., Østergaard C., Møller C.H., Kristensen M.A., Larsen J. 2019. International travel as source of a hospital outbreak with an unusual methicillin-resistant *Staphylococcus aureus* clonal complex 398, Denmark, 2016. *Eurosurveillance*. 24:1800680.

- Murray G.G.R., Wang F., Harrison E.M., Paterson G.K., Mather A.E., Harris S.R., Holmes M.A., Rambaut A., Welch J.J. 2016. The effect of genetic structure on molecular dating and tests for temporal signal. *Methods in Ecology and Evolution*. 7:80–89.
- Nielsen C.L., Kongsted H., Sørensen J.T., Krogh M.A. 2021. Antibiotic and medical zinc oxide usage in Danish conventional and welfare-label pig herds in 2016–2018. *Preventive Veterinary Medicine*. 189:105283.
- Page A.J., Cummins C.A., Hunt M., Wong V.K., Reuter S., Holden M.T.G., Fookes M., Falush D., Keane J.A., Parkhill J. 2015. Roary: rapid large-scale prokaryote pan genome analysis. *Bioinformatics*. 31:3691–3693.
- Page A.J., Silva N. de, Hunt M., Quail M.A., Parkhill J., Harris S.R., Otto T.D., Keane J.A. 2016. Robust high-throughput prokaryote de novo assembly and improvement pipeline for Illumina data. *Microbial Genomics*. 2:e000083.
- Paradis E., Claude J., Strimmer K. 2004. APE: Analyses of phylogenetics and evolution in R language. *Bioinformatics*. 20:289–290.
- Pérez-Moreno M.O., Centelles-Serrano M.J., Nogales-López J., Domenech-Spanedda M.F., Lozano C., Torres C. 2017. Unusual presence of the immune evasion gene cluster in livestock-associated MRSA of lineage CC398 causing peridural and psoas abscesses in a poultry farmer. *Enfermedades Infecciosas y Microbiología Clínica*. 35:651–654.
- Postma B., Poppelier M.J., Galen J.C. van, Prossnitz E.R., Strijp J.A.G. van, Haas C.J.C. de, Kessel K.P.M. van. 2004. Chemotaxis Inhibitory Protein of *Staphylococcus aureus* Binds Specifically to the C5a and Formylated Peptide Receptor. *The Journal of Immunology*. 172:6994–7001.
- Price L.B., Stegger M., Hasman H., Aziz M., Larsen J., Andersen P.S., Pearson T., Waters A.E., Foster J.T., Schupp J., Gillece J., Driebe E., Liu C.M., Springer B., Zdovc I., Battisti A., Franco A., Zmudzki J., Schwarz S., Butaye P., Jouy E., Pomba C., Porrero M.C., Ruimy R., Smith T.C., Robinson D.A., Weese J.S., Arriola C.S., Yu F., Laurent F., Keim P., Skov R., Aarestrup F.M. 2012. *Staphylococcus aureus* CC398: Host adaptation and emergence of methicillin resistance in livestock. *mBio*. 3:1–6.
- Rambaut A., Lam T.T., Max Carvalho L., Pybus O.G. 2016. Exploring the temporal structure of heterochronous sequences using TempEst (formerly Path-O-Gen). *Virus Evolution*. 2.
- Rankin D.J., Rocha E.P.C., Brown S.P. 2011. What traits are carried on mobile genetic elements, and why? *Heredity* 106:1. 106:1–10.
- Roberts A.P., Mullany P. 2009. A modular master on the move: the Tn916 family of mobile genetic elements. *Trends in Microbiology*. 17:251–258.
- Rooijackers S.H.M., Ruyken M., Roos A., Daha M.R., Presanis J.S., Sim R.B., van Wamel W.J.B., van Kessel K.P.M., van Strijp J.A.G. 2005. Immune evasion by a staphylococcal complement inhibitor that acts on C3 convertases. *Nature Immunology* 2005 6:9. 6:920–927.
- Seemann T. 2014. Prokka: Rapid prokaryotic genome annotation. *Bioinformatics*. 30:2068–2069.
- Sieber R.N., Larsen A.R., Urth T.R., Iversen S., Møller C.H., Skov R.L., Larsen J., Stegger M. 2019. Genome investigations show host adaptation and transmission of LA-MRSA CC398 from pigs into Danish healthcare institutions. *Scientific Reports* 2019 9:1. 9:1–10.
- Sievers F., Higgins D.G. 2018. Clustal Omega for making accurate alignments of many protein sequences. *Protein Science*. 27:135–145.



- Silva A.G. da, Baines S.L., Carter G.P., Heffernan H., French N.P., Ren X., Seemann T., Bulach D., Kwong J., Stinear T.P., Howden B.P., Williamson D.A. 2017. A phylogenomic framework for assessing the global emergence and evolution of clonal complex 398 methicillin-resistant *Staphylococcus aureus*. *Microbial Genomics*. 3.
- Sjölund M., Postma M., Collineau L., Lösken S., Backhans A., Belloc C., Emanuelson U., Beilage E.G., Stärk K., Dewulf J., Beilage E.G., GrosseLiesner B., Körk C.A., Lindberg A., Seemer H., Visschers V. 2016. Quantitative and qualitative antimicrobial usage patterns in farrow-to-finish pig herds in Belgium, France, Germany and Sweden. *Preventive Veterinary Medicine*. 130:41–50.
- Stamatakis A. 2014. RAxML version 8: a tool for phylogenetic analysis and post-analysis of large phylogenies. *Bioinformatics*. 30:1312–1313.
- Tang Y., Larsen J., Kjeldgaard J., Andersen P.S., Skov R., Ingmer H. 2017. Methicillin-resistant and -susceptible *Staphylococcus aureus* from retail meat in Denmark. *International Journal of Food Microbiology*. 249:72–76.
- Thammavongsa V., Kim H.K., Missiakas D., Schneewind O. 2015. Staphylococcal manipulation of host immune responses. *Nature Reviews Microbiology* 2015 13:9. 13:529–543.
- Turner N.A., Sharma-Kuinkel B.K., Maskarinec S.A., Eichenberger E.M., Shah P.P., Carugati M., Holland T.L., Fowler V.G. 2019. Methicillin-resistant *Staphylococcus aureus*: an overview of basic and clinical research. *Nature Reviews Microbiology* 2019 17:4. 17:203–218.
- Vandendriessche S., Vanderhaeghen W., Larsen J., de Mendonça R., Hallin M., Butaye P., Hermans K., Haesebrouck F., Denis O. 2014. High genetic diversity of methicillin-susceptible *Staphylococcus aureus* (MSSA) from humans and animals on livestock farms and presence of SCCmec remnant DNA in MSSA CC398. *Journal of Antimicrobial Chemotherapy*. 69:355–362.
- de Vries L.E., Christensen H., Skov R.L., Aarestrup F.M., Agersø Y. 2009. Diversity of the tetracycline resistance gene tet(M) and identification of Tn916- and Tn5801-like (Tn6014) transposons in *Staphylococcus aureus* from humans and animals. *Journal of Antimicrobial Chemotherapy*. 64:490–500.
- van Wamel W.J.B., Rooijackers S.H.M., Ruyken M., van Kessel K.P.M., van Strijp J.A.G. 2006. The innate immune modulators staphylococcal complement inhibitor and chemotaxis inhibitory protein of *Staphylococcus aureus* are located on  $\beta$ -hemolysin-converting bacteriophages. *Journal of Bacteriology*. 188:1310–1315.
- Ward M.J., Gibbons C.L., McAdam P.R., van Bunnik B.A.D., Girvan E.K., Edwards G.F., Fitzgerald J.R., Woolhouse M.E.J. 2014. Time-scaled evolutionary analysis of the transmission and antibiotic resistance dynamics of *Staphylococcus aureus* clonal complex 398. *Applied and Environmental Microbiology*. 80:7275–7282.
- WHO. 2015. Global Action Plan on Antimicrobial Resistance. .
- Wingett S.W., Andrews S. 2018. FastQ Screen: A tool for multi-genome mapping and quality control. *F1000Research*. 7:1338.
- Zhou Z., Alikhan N.-F., Sergeant M.J., Luhmann N., Vaz C., Francisco A.P., Carriço J.A., Achtman M. 2018. GrapeTree: visualization of core genomic relationships among 100,000 bacterial pathogens. *Genome Research*. 28:1395.
- Zou G., Matuszewska M., Jia M., Zhou J., Ba X., Duan J., Zhang C., Zhao J., Tao M., Fan J., Zhang X., Jin W., Cui T., Zeng X., Jia M., Qian X., Huang C., Zhuo W., Yao Z., Zhang L., Li S., Li L., Huang Q., Wu B., Chen H., Tucker A.W., Grant A.J., Holmes M.A., Zhou R. 2021.

A survey of Chinese pig farms and human healthcare isolates reveals separate human and animal MRSA populations. bioRxiv.:2021.08.02.454852.

**a**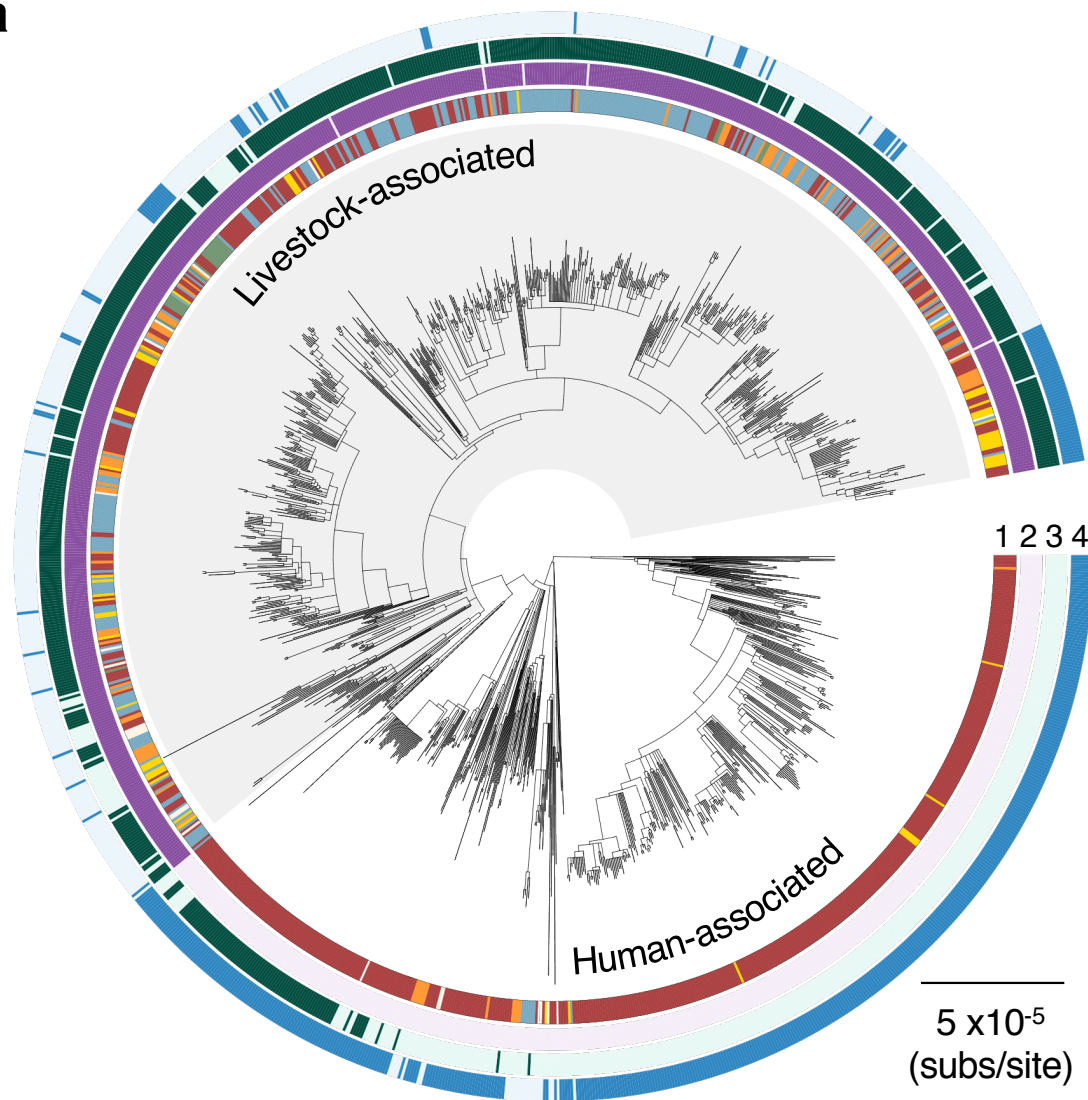**b**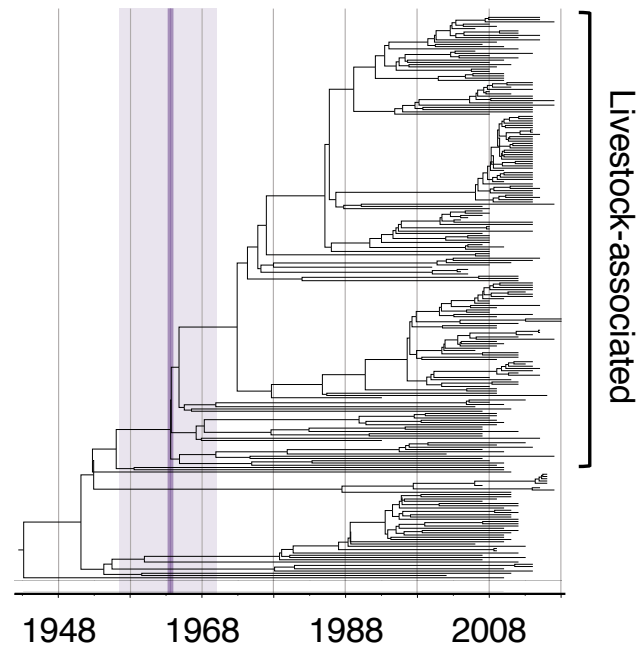**1. Host groups**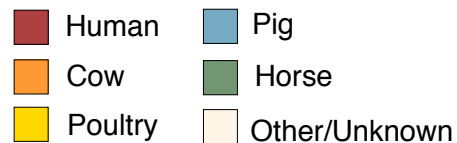**Mobile genetic elements**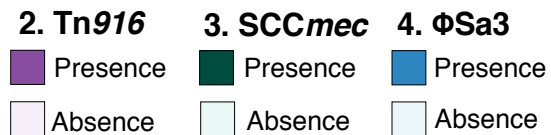

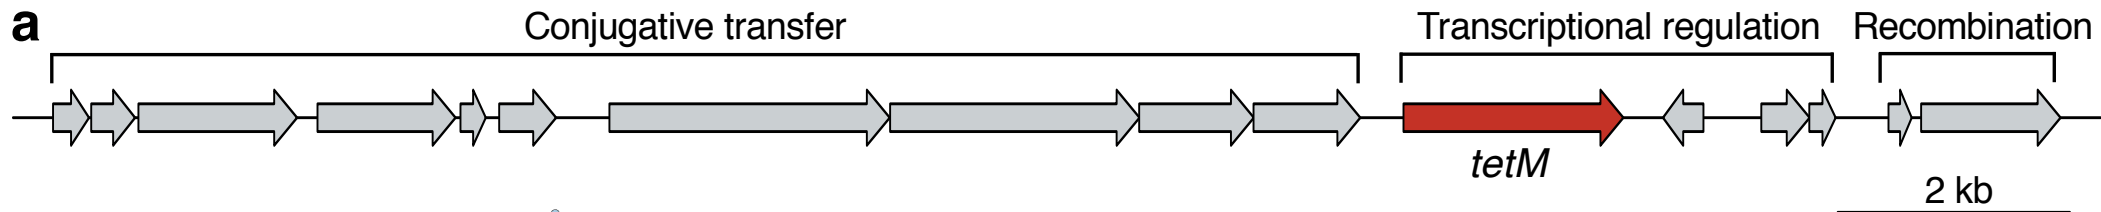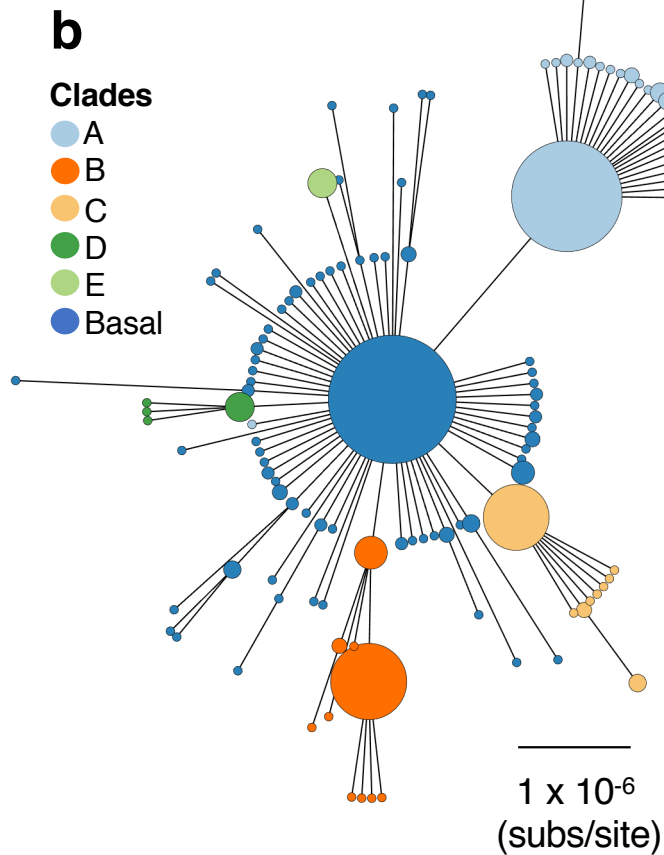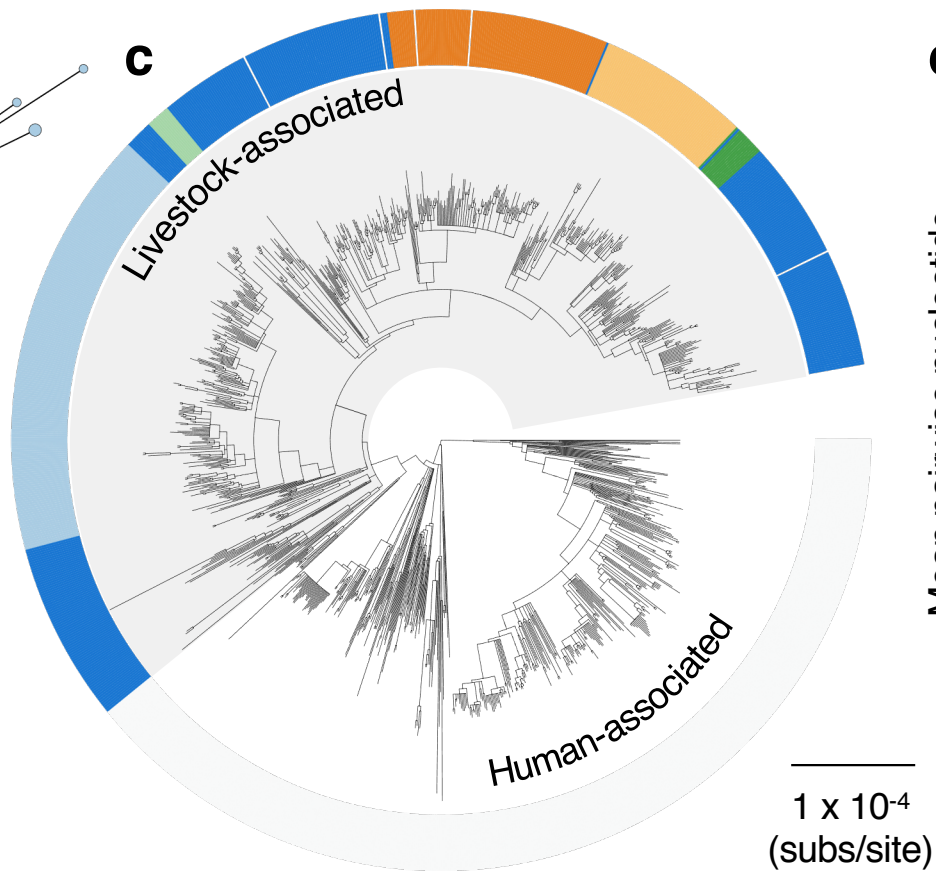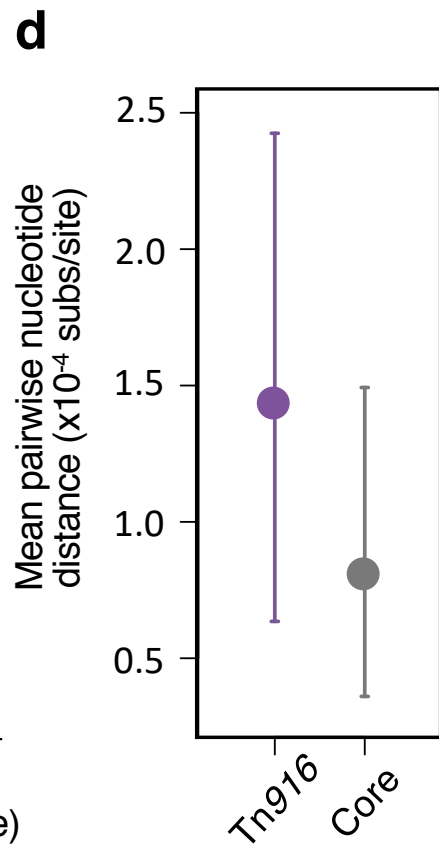

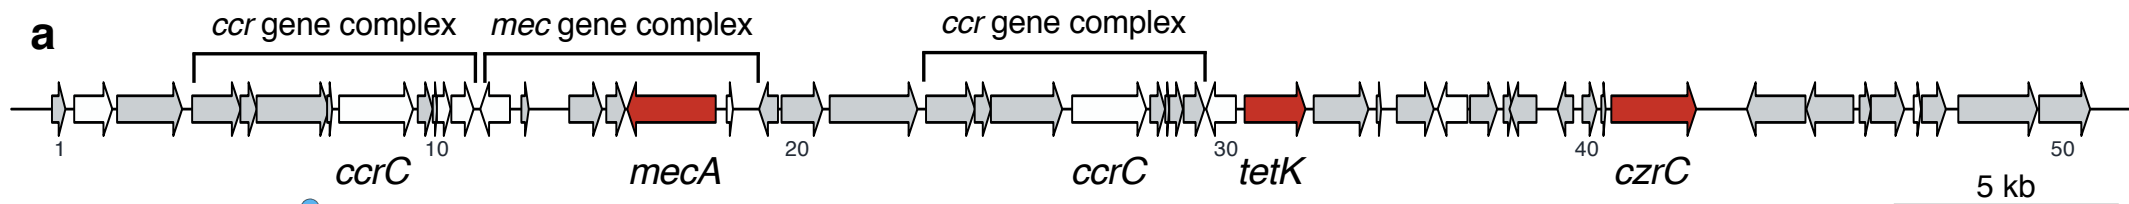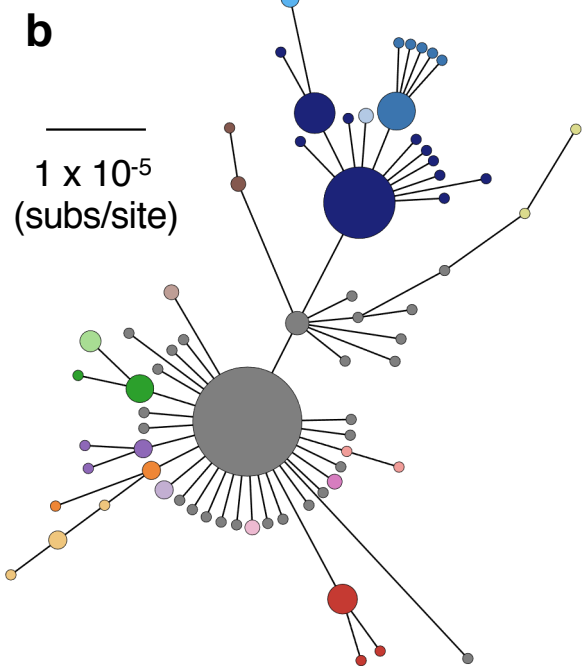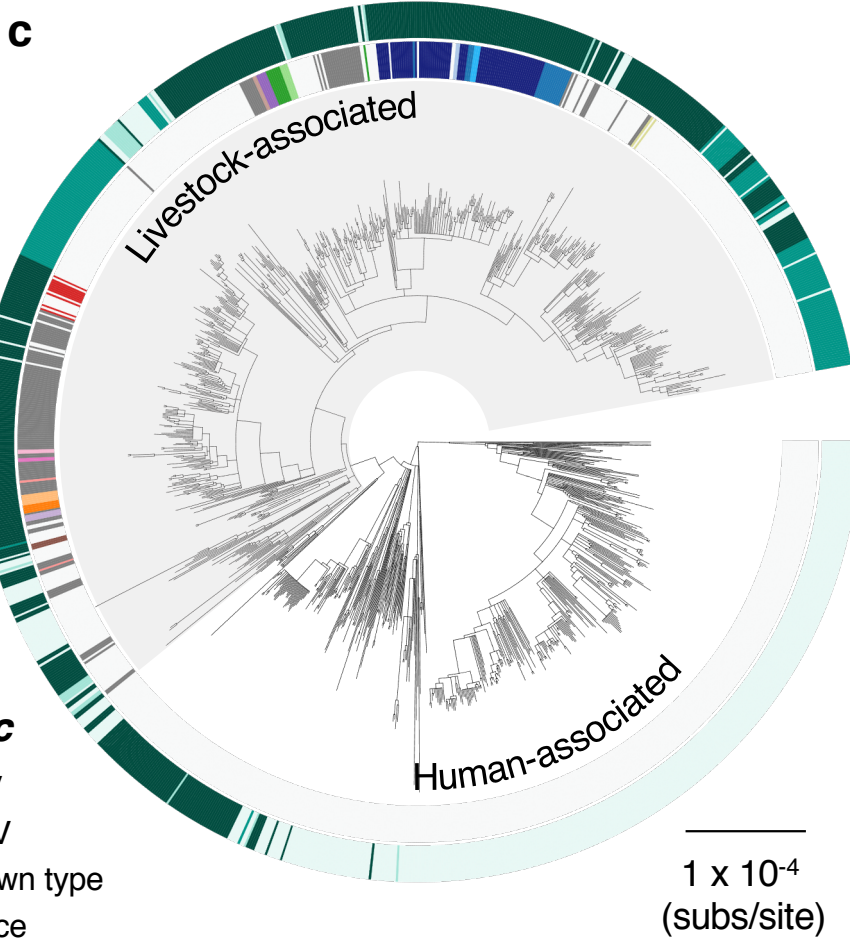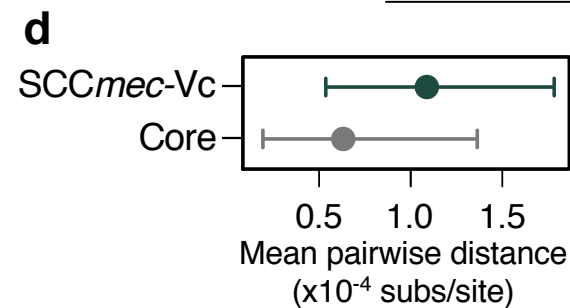

**Clades**

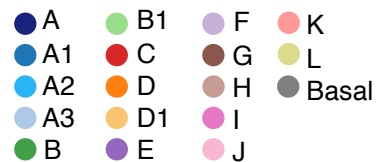

**SCC*mec***

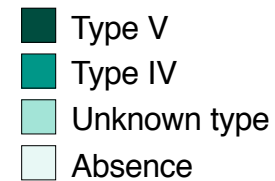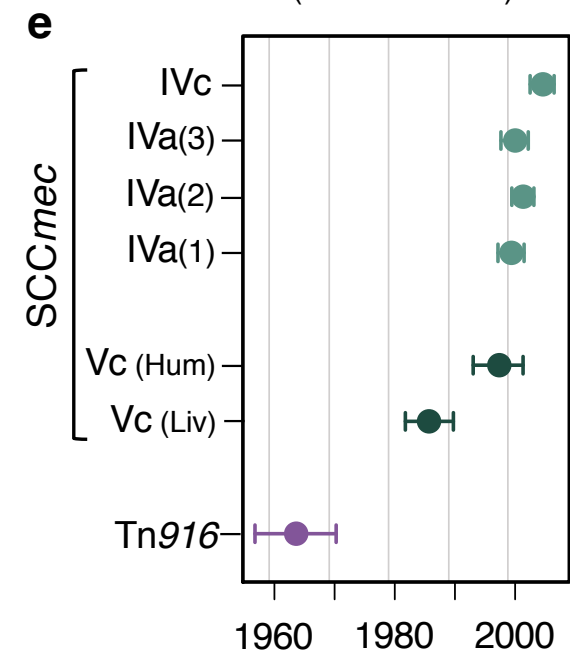

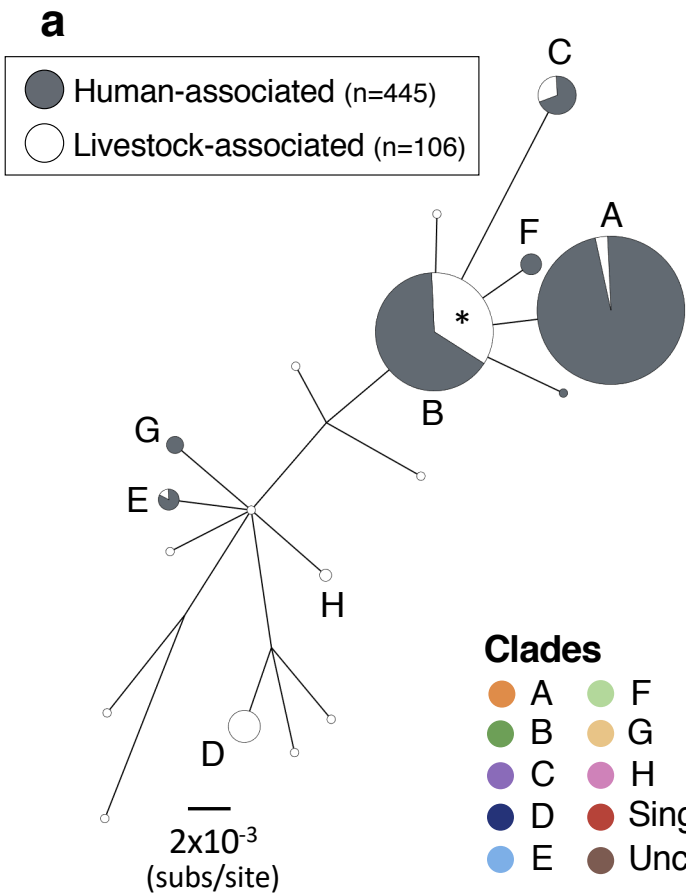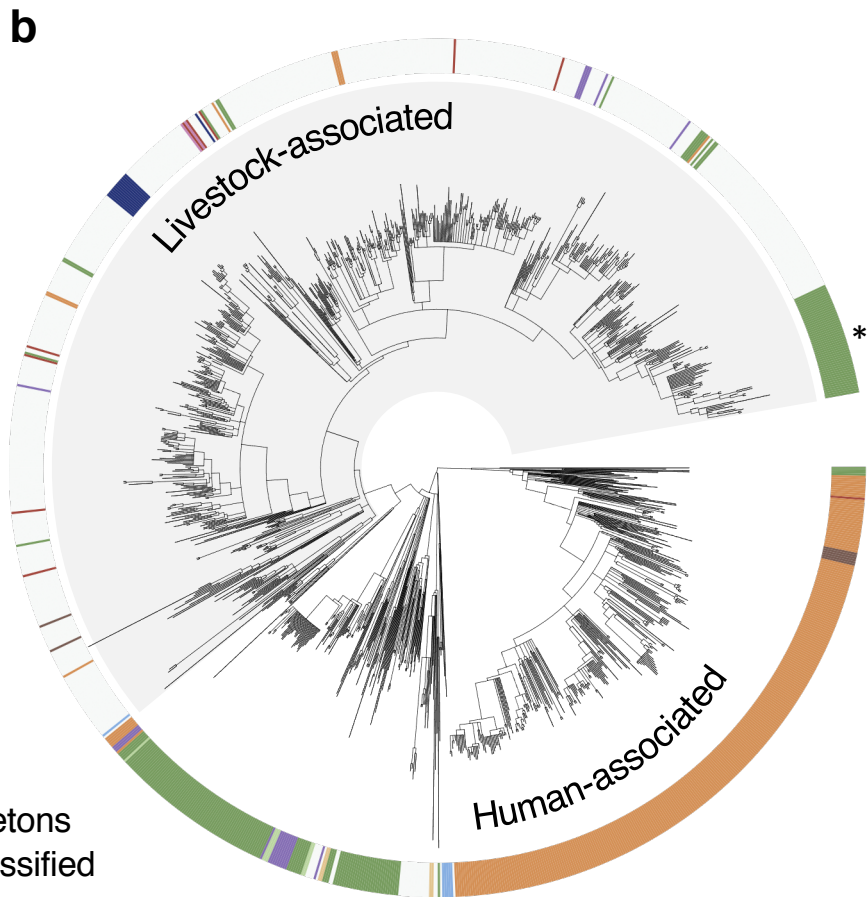

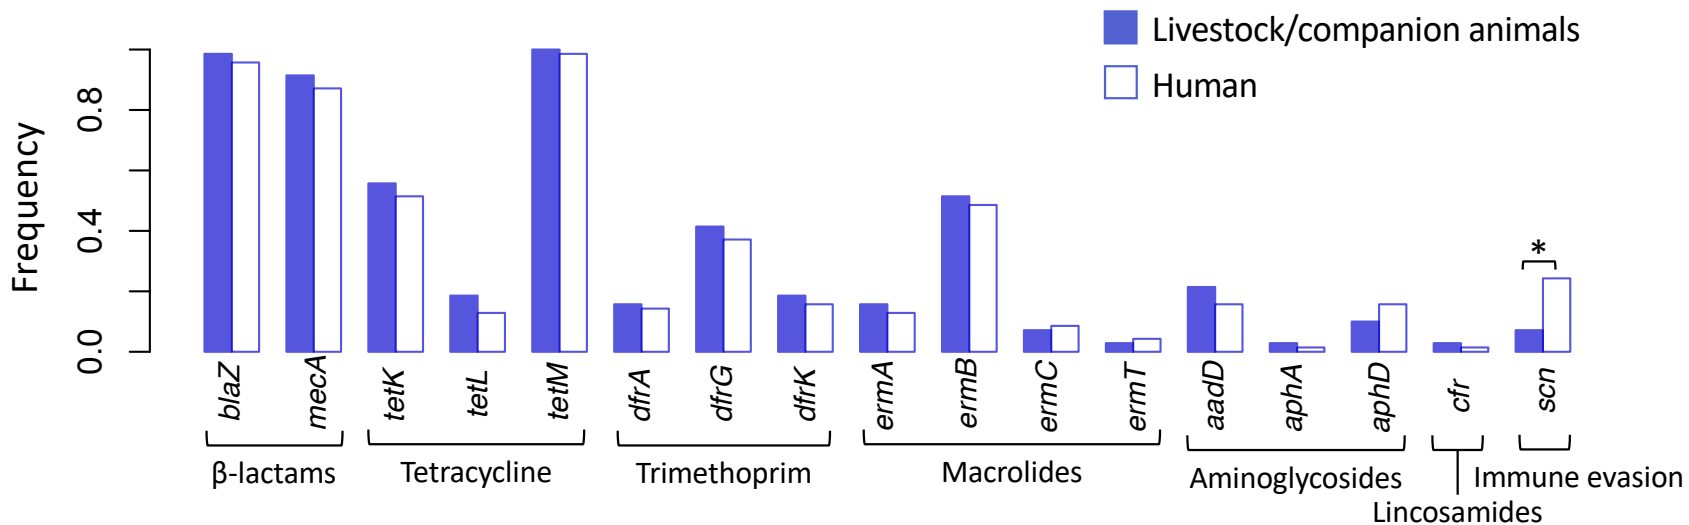

Source: https://www.biorxiv.org/content/10.1101/2021.08.20.457141v2.full.pdf
